# Supplementary material for: The Perceived Value of Passive Animal Health Surveillance: The Case of Highly Pathogenic Avian Influenza in Vietnam
Source: PubMed Central journal article supplement (PMC4758386; doi:10.1111/zph.12212), 2015-07-03
Supplement: ZPH-63-112-s001.pdf [file ZPH-63-112-s001.pdf]

Checklist

Semi-structured interview

factors influencing poultry farmers' decision-making

## **1. Understand the motivations of the interviewee to disclose or hide information**

### *1.1. Make the interviewee in the situation of a choice to notify or not:*

First: Checking of the history of the farm regarding the case definition adopted:

Case definition: more than 50% of mortality in 5 days.

- ⇒ *If this situation happened in the interviewee's farm*: reasons farmers decided to share the information with some actors + the reasons he decided to report the disease to authorities or not
- ⇒ *If the situation did not happen*: imagine it happens in his farm. Reasons to report to veterinary authorities or not.

### *1.2. Explore more in details the factors of decision:*

- ⇒ List the consequences of the report of disease case
- ⇒ List the consequences for a positive case and declaration of a notifiable disease
- ⇒ List the consequences if the disease case is not reported

## **2. Precise identification of the actors influencing the participants' decision to report and the motivations behind these influences**

*TOOL = list of actors (winner-loser list)*

Among the listed persons identification of the ones that can influence the decision of the interviewee to report or not report.

## **3. Semi-quantification of the importance of the different reasons to report or not report**

*TOOL = Proportional piling => ascribe a weight to the different arguments to report or not report.*

## **4. Sources of information**

- ⇒ List sources of information of the interviewee on above-mentioned case definition.
- ⇒ Reasons of the interest of these sources of information
