# Supplementary material for: The Perceived Value of Passive Animal Health Surveillance: The Case of Highly Pathogenic Avian Influenza in Vietnam
Source: PubMed Central journal article supplement (PMC4758386; doi:10.1111/zph.12212), 2015-07-03
Supplement: ZPH-63-112-s002.pdf [file ZPH-63-112-s002.pdf]

## Checklist

### Focus groups poultry farmers

#### **1. Description of poultry farming systems and associated value chain**

- Sources of chicks
- Sources of feed
- Sources of medicines
- Sale of farm products

#### **2. Description of problems met in poultry farming :**

*TOOL: simple ranking*

#### **3. Description of animal diseases impacting poultry farms**

*TOOL: PP*

- Names given to sanitary events
- Impact on income
- Rate of mortality and duration of disease

#### **4. Description of management of diseases matching the case definition**

Case definition: more than 50% of mortality in 5 days.

*TOOL: PP*

- Actors contacted and actions taken
